# Supplementary material
Source: PubMed Central journal article supplement (PMC3176505)

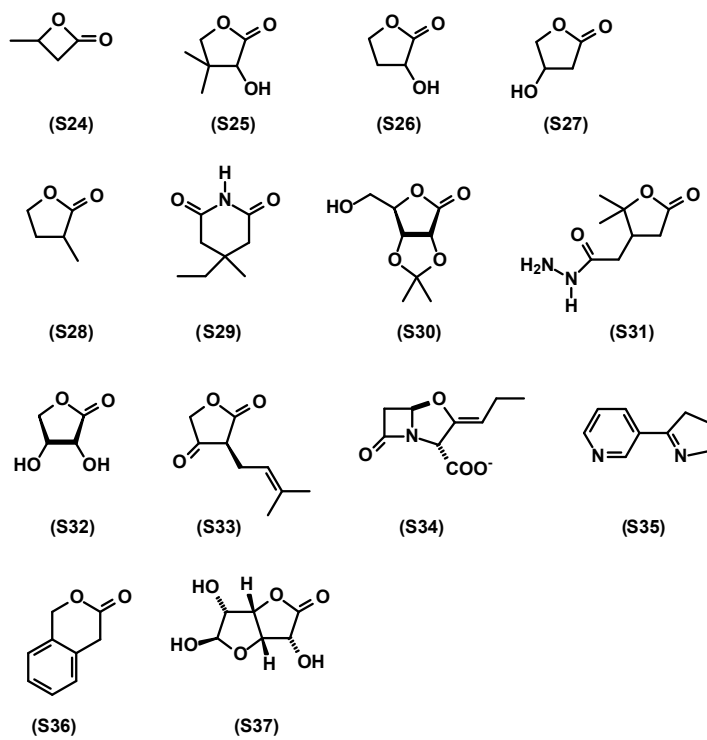

**Figure S1:** Compounds found not to be substrates for Dr0930.

Supplement: NIHMS91568-supplement-1_si_001.pdf [file NIHMS91568-supplement-1_si_001.pdf]
